# Supplementary material for: Subsurface ocean warming preceded Heinrich Events
Source: Springer Nature journal article supplement (doi:10.1038/s41467-022-31754-x), 2022-07-21
Supplement: MOESM1 [file 41467_2022_31754_MOESM1_ESM.pdf]

Supplementary Materials for:

## Subsurface ocean warming preceded Heinrich Events

L. Max\*, D. Nürnberg, C. M. Chiessi, M. M. Lenz, S. Mulitza

This supplementary document contains the following information:

Supplementary Figs. 1 to 4

Supplementary Table 1

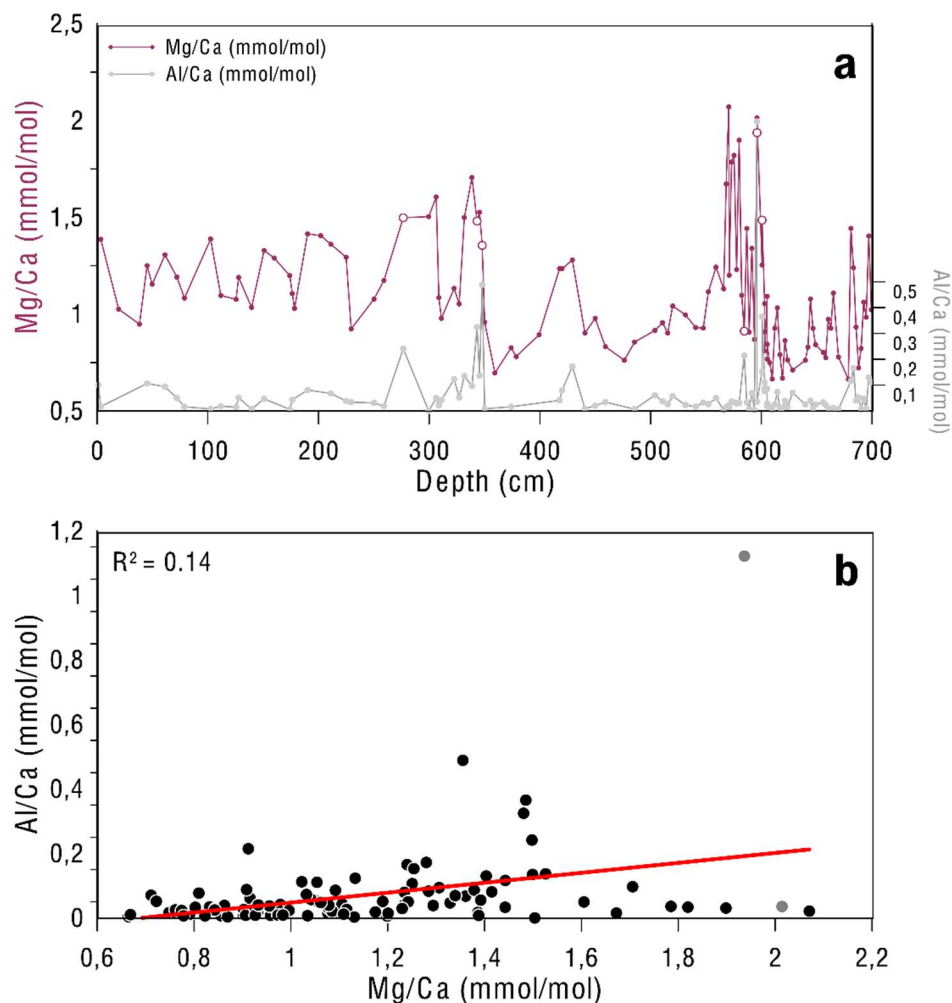

**Supplementary Fig. 1 Quality control for Mg/Ca measurements.** (a) Al/Ca is used to monitor the potential influence of silicate contamination in foraminiferal Mg/Ca ratios. Al/Ca >0.1 mmol/mol suggest contamination may be significant<sup>40</sup>. Most samples are well below Al/Ca >0.1 mmol/mol. Six samples (open circles) have values above Al/Ca >0.2 mmol/mol but do not appear to have anomalously elevated Mg/Ca ratios. (b) Cross-plot of Mg/Ca values versus Al/Ca values showing generally weak correlation between Mg/Ca and Al/Ca ( $r^2 = 0.14$ ). Grey spots indicate replicate measurements of a sample with highly elevated Al/Ca ratio.

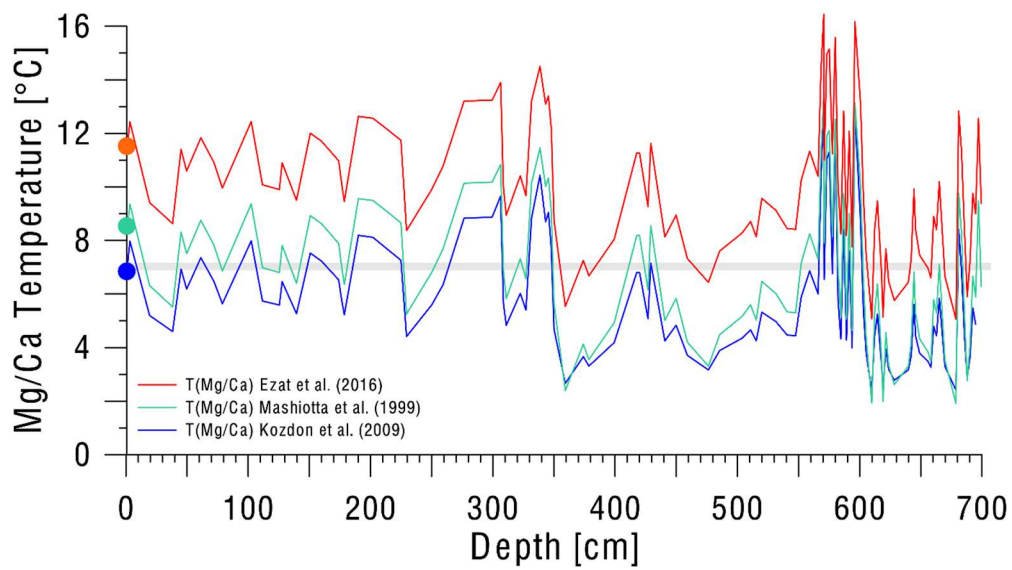

**Supplementary Fig. 2 Comparison of different *N.pachyderma* sin. Mg/Ca-temperature calibrations<sup>42-44</sup>.** Grey bar indicates modern subSST<sub>150m</sub><sup>15</sup> near core site GeoB18530-1. Coloured spots indicate core-top Mg/Ca-temperatures for different calibrations.

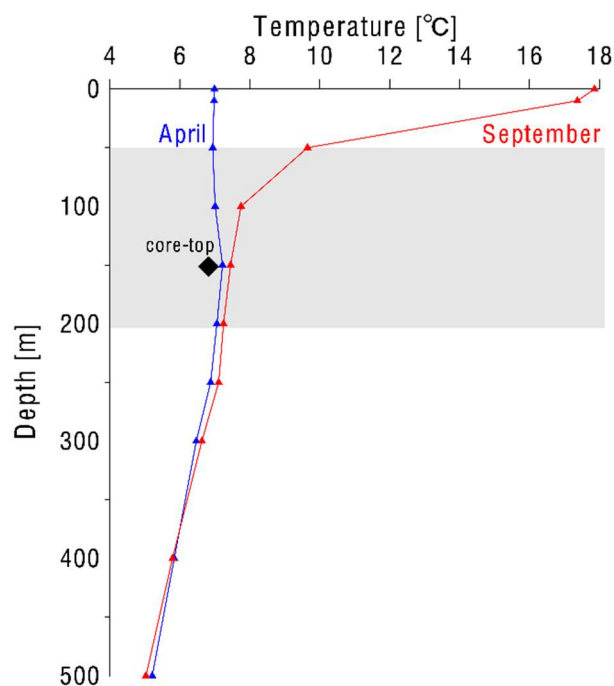

**Supplementary Fig 3. Instrumental temperature profiles near site GeoB18530-1.** Temperature profile for April (blue) and September (red) close to core site GeoB18530-1<sup>15</sup>. Grey bar indicates modern habitat depth range of *N.pachyderma* sin. in the North Atlantic<sup>43,45</sup>. Black diamond = core-top Mg/Ca temperature of GeoB18530-1 calibrated after ref.43.

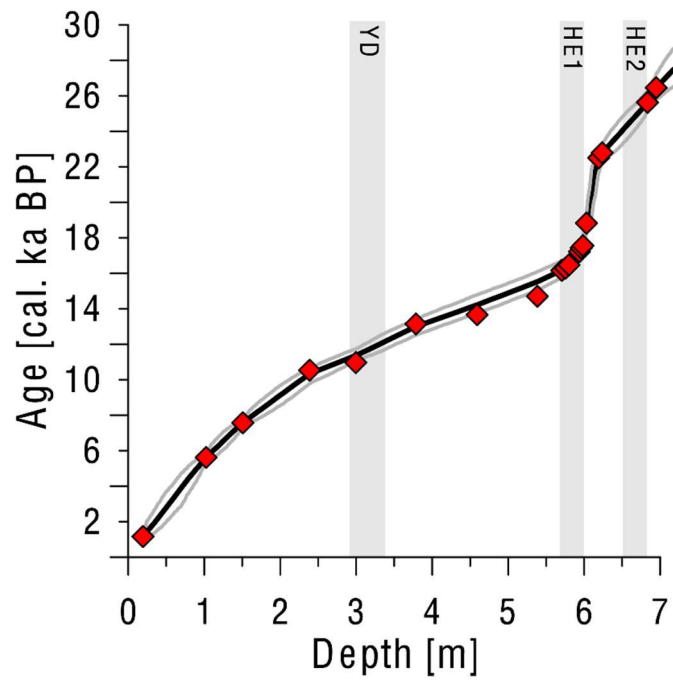

**Supplementary Fig. 4 Age model of sediment core GeoB18530-1.** Results of age-depth modeling using the R script BACON<sup>51</sup> with mean ages (black line) and 95% confidence intervals (grey lines) for GeoB18530-1. Red diamonds = Age control points from accelerator mass spectrometry radiocarbon datings; Grey bars = Heinrich Layers and YD.

**Supplementary Table 1** Radiocarbon ages and derived age model of GeoB18530-1.

List of radiocarbon ages from core GeoB18530-1

| Depth [m] | Lab code     | Type | <sup>14</sup> C age raw [ka] | Age error +/- [ka] | Reservoir Age [ka] | lower age [ka] 2σ | upper age [ka] 2σ | Calendar age [ka BP] | Sample type                                              |
|-----------|--------------|------|------------------------------|--------------------|--------------------|-------------------|-------------------|----------------------|----------------------------------------------------------|
| 0,194     | Poz-81680    | AMS  | 1,65                         | 0,03               | 0,445              | 0,98              | 1,28              | 1,13                 | <i>N.pachyderma</i> sin.                                 |
| 1,025     | Poz-81681    | AMS  | 5,33                         | 0,035              | 0,436              | 5,47              | 5,88              | 5,64                 | <i>N.pachyderma</i> sin.                                 |
| 1,508     | BE-12553.1.1 | AMS  | 7,20                         | 0,046              | 0,468              | 7,43              | 7,69              | 7,59                 | <i>N.pachyderma</i> sin.                                 |
| 2,387     | Poz-81682    | AMS  | 9,72                         | 0,06               | 0,359              | 10,28             | 11,06             | 10,57                | <i>N.pachyderma</i> sin.                                 |
| 2,995     | BE-12554.1.1 | AMS  | 10,54                        | 0,049              | 0,722              | 10,88             | 11,61             | 11,25                | <i>N.pachyderma</i> sin.                                 |
| 3,786     | Poz-81683    | AMS  | 12,33                        | 0,06               | 0,844              | 13,07             | 13,79             | 13,38                | <i>N.pachyderma</i> sin.                                 |
| 4,591     | Poz-81685    | AMS  | 12,83                        | 0,07               | 0,781              | 13,50             | 14,83             | 14,01                | <i>N.pachyderma</i> sin.                                 |
| 5,384     | Poz-81686    | AMS  | 13,31                        | 0,07               | 0,802              | 14,06             | 15,36             | 14,70                | <i>N.pachyderma</i> sin.                                 |
| 5,706     | BE-12555.1.1 | AMS  | 13,96                        | 0,051              | 0,874              | 15,15             | 16,26             | 15,69                | <i>N.pachyderma</i> sin.                                 |
| 5,754     | BE-12556.1.1 | AMS  | 14,06                        | 0,051              | 0,875              | 15,26             | 16,38             | 15,82                | <i>N.pachyderma</i> sin.                                 |
| 5,8       | BE-12557.1.1 | AMS  | 14,28                        | 0,06               | 0,896              | 15,56             | 16,74             | 16,12                | mixed planktics ( <i>G. bulloides/N.pachyderma</i> sin.) |
| 5,938     | BE-12558.1.1 | AMS  | 15,14                        | 0,054              | 1,002              | 16,65             | 17,83             | 17,22                | <i>N.pachyderma</i> sin.                                 |
| 5,961     | BE-12559.1.1 | AMS  | 15,03                        | 0,054              | 0,982              | 16,50             | 17,72             | 17,07                | <i>N.pachyderma</i> sin.                                 |
| 5,984     | BE-12560.1.1 | AMS  | 15,40                        | 0,053              | 1,027              | 17,05             | 18,12             | 17,55                | <i>N.pachyderma</i> sin.                                 |
| 6,03      | BE-12561.1.1 | AMS  | 16,60                        | 0,058              | 1,02               | 18,31             | 19,36             | 18,87                | <i>N.pachyderma</i> sin.                                 |
| 6,191     | BE-12562.1.1 | AMS  | 20,19                        | 0,084              | 1,014              | 22,68             | 23,75             | 23,21                | <i>N.pachyderma</i> sin.                                 |
| 6,237     | Poz-81687    | AMS  | 19,97                        | 0,12               | 1,05               | 22,38             | 23,67             | 22,82                | <i>N.pachyderma</i> sin.                                 |
| 6,833     | BE-12563.1.1 | AMS  | 22,30                        | 0,099              | 1,204              | 24,98             | 25,87             | 25,44                | <i>N.pachyderma</i> sin.                                 |
| 6,948     | Poz-81689    | AMS  | 24,09                        | 0,18               | 1,241              | 26,46             | 27,66             | 27,11                | <i>N.pachyderma</i> sin.                                 |
| 7,5       | Poz-81690    | AMS  | 31,20                        | 0,4                | 1,087              | 33,81             | 35,45             | 34,64                | <i>N.pachyderma</i> sin.                                 |
